# Supplementary material
Source: PubMed Central journal article supplement (PMC7966659)

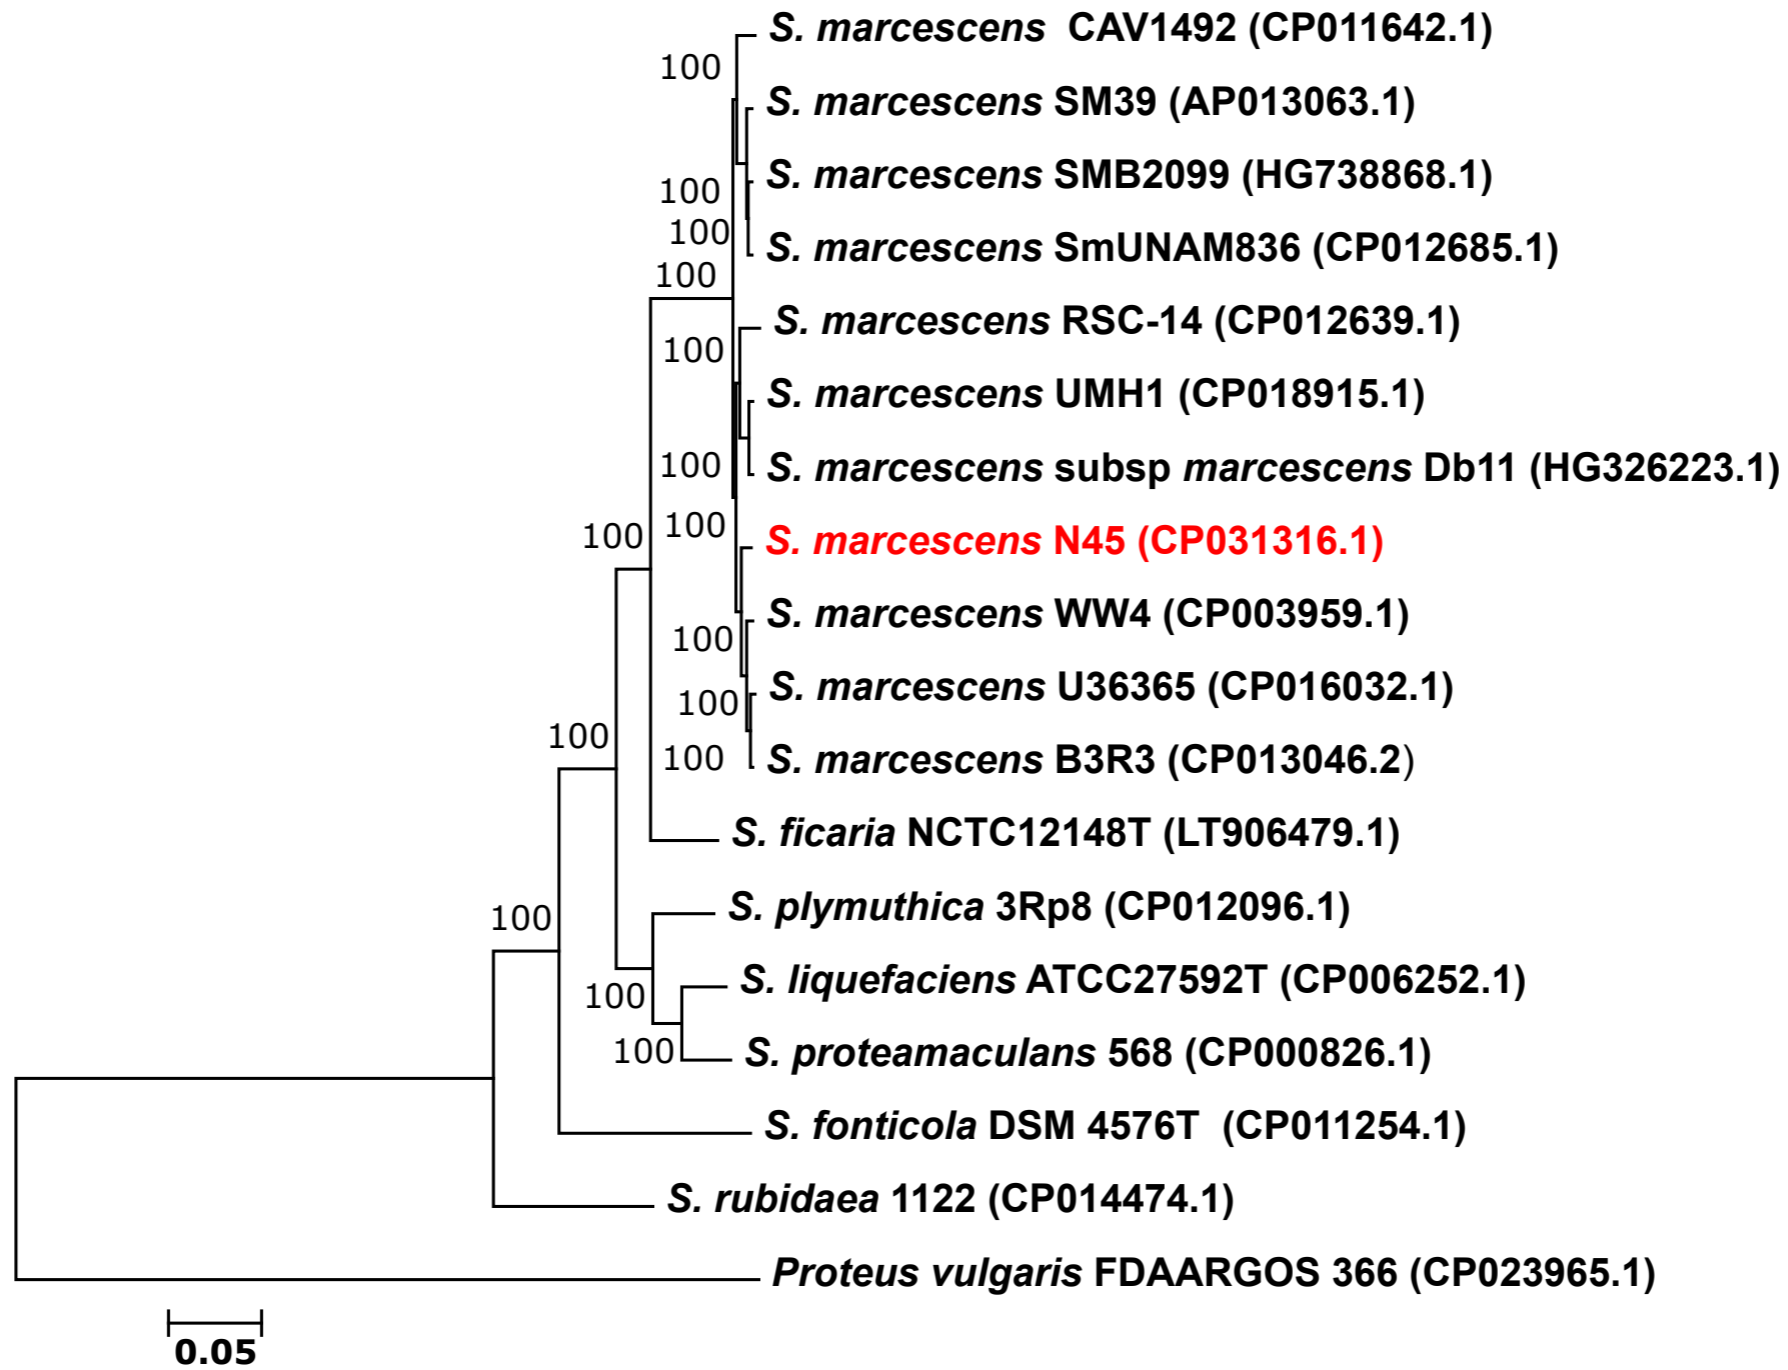

Figure S1

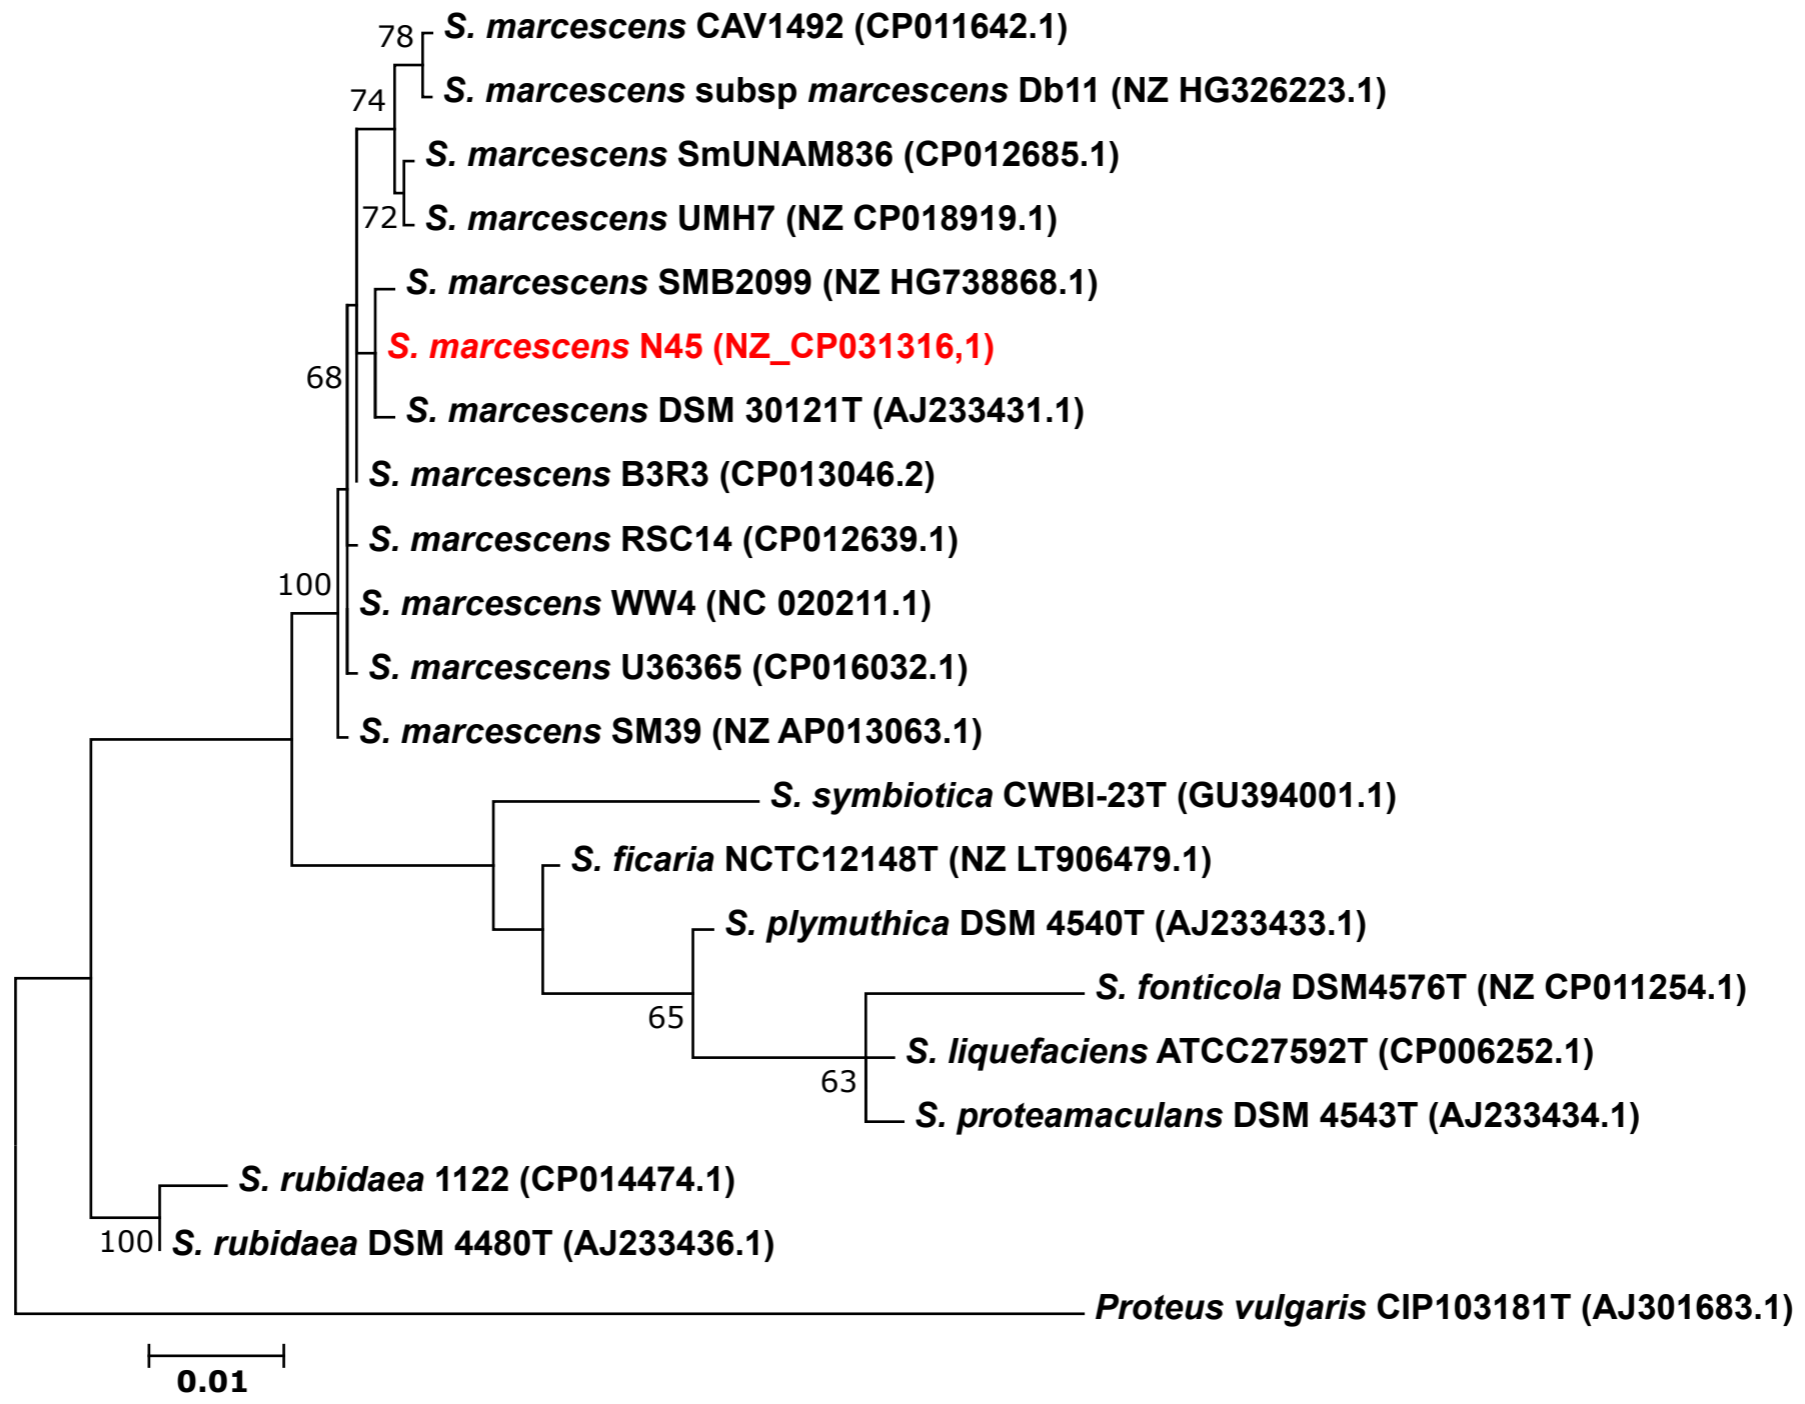

**Figure S2**

Supplement: 42770_2020_382_MOESM1_ESM.pdf [file 42770_2020_382_MOESM1_ESM.pdf]
